# Supplementary material
Source: MDPI journal article supplement (https://www.mdpi.com/2504-4494/7/1/38)
Supplement: s1 [file s1]

# Mechanical Performance over Energy Expenditure in MEX 3D Printing of Polycarbonate: A Multiparametric Optimization with the Aid of Robust Experimental Design

Nectarios Vidakis <sup>1,\*</sup>, Markos Petousis <sup>1</sup>, Constantine N. David <sup>2</sup>, Dimitrios Sagris <sup>2</sup>, Nikolaos Mountakis <sup>1</sup> and Emmanuel Karapidakis <sup>3</sup>

<sup>1</sup> Department of Mechanical Engineering, Hellenic Mediterranean University, 71410 Heraklion, Greece

<sup>2</sup> Department of Mechanical Engineering, International Hellenic University, 62124 Serres, Greece

<sup>3</sup> Electrical and Computer Engineering Dept., Hellenic Mediterranean University, 71410 Heraklion, Greece

\* Correspondence: vidakis@hmu.gr; Tel.: +30-2810379227

**Abstract:** A single paragraph of about 200 words maximum. For research articles, abstracts should give a pertinent overview of the work. We strongly encourage authors to use the following style of structured abstracts, but without headings: (1) Background: Place the question addressed in a broad context and highlight the purpose of the study; (2) Methods: briefly describe the main methods or treatments applied; (3) Results: summarize the article's main findings; (4) Conclusions: indicate the main conclusions or interpretations. The abstract should be an objective representation of the article and it must not contain results that are not presented and substantiated in the main text and should not exaggerate the main conclusions.

**Keywords:** Sustainable Additive Manufacturing; Polycarbonate (PC); Optimization; Material Extrusion (MEX); Energy consumption; Compression Test; Taguchi Analysis; Robust Design

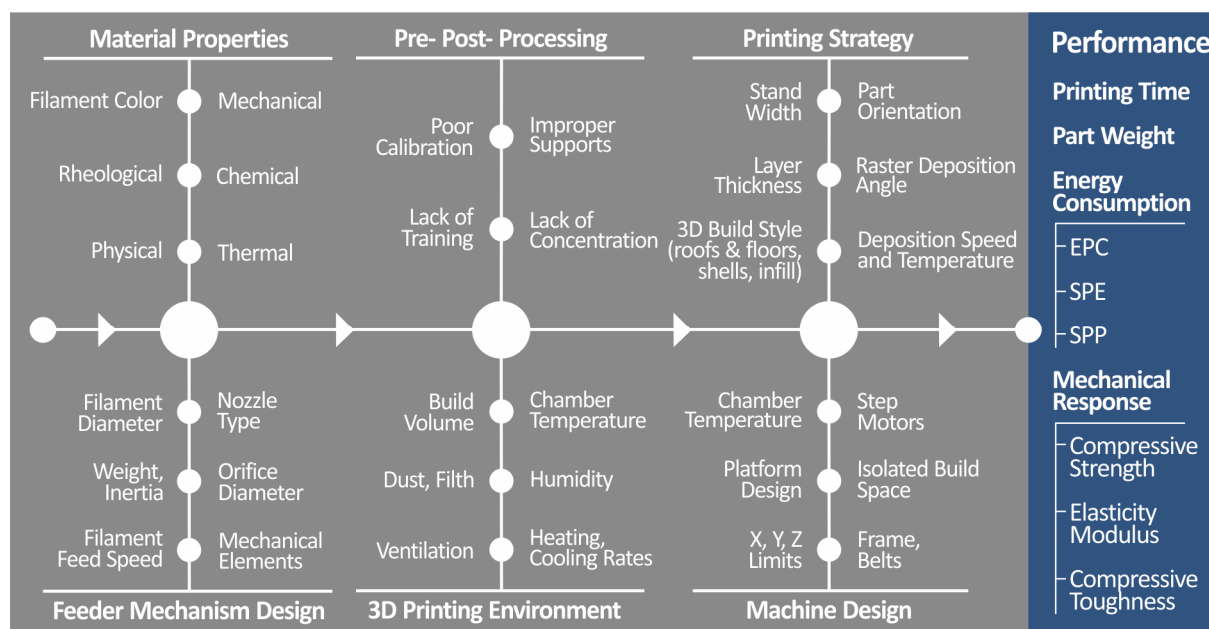

**Figure S1.** Cause and effect diagram, indicating the parameters affecting the performance of the 3D printed parts regarding the energy consumption and the mechanical response under compression loading.

## Morphological examination

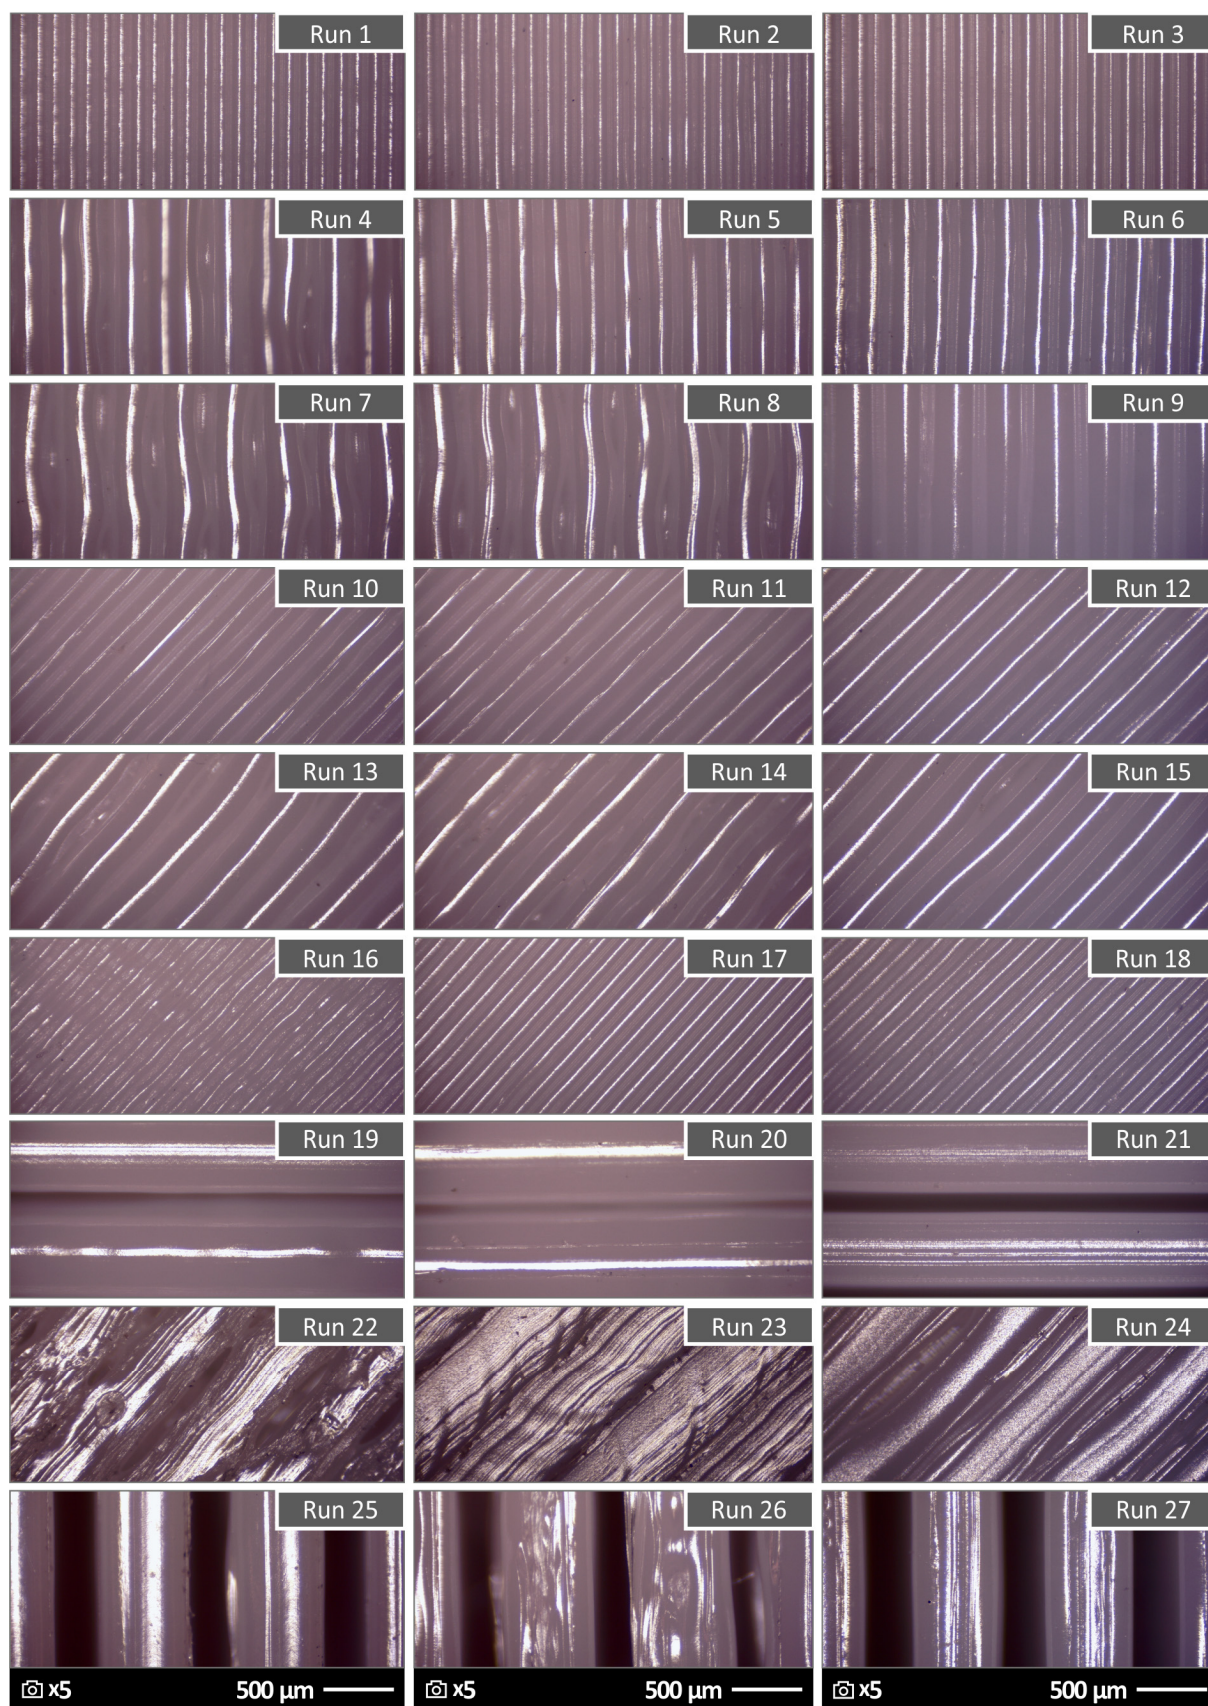

Figure S2. Typical samples 3D printed with the various control parameters' values.

## Design of experiment and experimental results

**Supplementary Table S1.** Measured Weight, Printing Time, Compressive Strength, Compressive Modulus of Elasticity and Compressive Toughness for each experimental run and five replicas per run.

| A/A | Run | Weight (g) | Printing Time (sec) | sB [MPa] | E [MPa] | Toughness [MJ/m <sup>3</sup> ] |
|-----|-----|------------|---------------------|----------|---------|--------------------------------|
| 1   | 1   | 6.49       | 6041                | 48.78    | 1035.20 | 4.30                           |
| 2   |     | 7.06       | 9215                | 49.78    | 1100.42 | 4.36                           |
| 3   |     | 6.90       | 6094                | 49.36    | 1112.78 | 4.42                           |
| 4   |     | 6.81       | 9048                | 40.60    | 949.49  | 4.10                           |
| 5   |     | 6.90       | 6196                | 49.73    | 1116.76 | 4.16                           |
| 6   | 2   | 8.69       | 3536                | 50.50    | 1154.38 | 4.69                           |
| 7   |     | 8.19       | 3664                | 50.43    | 1117.93 | 4.71                           |
| 8   |     | 8.29       | 5411                | 51.33    | 1128.60 | 4.73                           |
| 9   |     | 8.19       | 5371                | 50.31    | 1129.13 | 4.75                           |
| 10  |     | 8.29       | 3648                | 51.03    | 1131.82 | 4.44                           |
| 11  | 3   | 6.78       | 2882                | 50.08    | 1084.87 | 4.91                           |
| 12  |     | 6.70       | 2778                | 52.15    | 1157.44 | 4.76                           |
| 13  |     | 6.70       | 4201                | 52.74    | 1110.64 | 6.02                           |
| 14  |     | 6.70       | 2786                | 51.36    | 1109.22 | 5.31                           |
| 15  |     | 6.62       | 4054                | 51.83    | 1128.31 | 5.11                           |
| 16  | 4   | 8.15       | 3109                | 59.39    | 1190.84 | 8.02                           |
| 17  |     | 8.23       | 3043                | 59.14    | 1209.84 | 7.74                           |
| 18  |     | 8.23       | 3132                | 58.69    | 1179.18 | 7.72                           |
| 19  |     | 8.56       | 4409                | 58.78    | 1194.51 | 7.63                           |
| 20  |     | 8.48       | 4416                | 58.43    | 1182.33 | 7.64                           |
| 21  | 5   | 8.94       | 2296                | 61.03    | 1202.96 | 8.07                           |
| 22  |     | 7.92       | 2337                | 61.47    | 1200.62 | 8.08                           |
| 23  |     | 8.26       | 2351                | 60.37    | 1218.73 | 7.88                           |
| 24  |     | 8.43       | 3404                | 61.03    | 1189.16 | 7.83                           |
| 25  |     | 8.77       | 2397                | 59.94    | 1172.44 | 7.80                           |
| 26  | 6   | 7.47       | 2081                | 64.34    | 1193.22 | 8.63                           |
| 27  |     | 7.38       | 2151                | 64.03    | 1188.51 | 8.44                           |
| 28  |     | 7.55       | 1447                | 61.80    | 1159.58 | 7.76                           |
| 29  |     | 7.71       | 1488                | 61.69    | 1079.11 | 7.92                           |
| 30  |     | 8.29       | 2174                | 62.34    | 1157.69 | 8.01                           |
| 31  | 7   | 9.50       | 3137                | 64.55    | 1188.42 | 8.99                           |
| 32  |     | 9.50       | 4688                | 62.20    | 1129.87 | 8.99                           |
| 33  |     | 9.42       | 3020                | 64.86    | 1118.62 | 9.22                           |
| 34  |     | 9.68       | 3182                | 68.14    | 1179.35 | 9.78                           |
| 35  |     | 9.50       | 3129                | 61.66    | 1100.38 | 8.76                           |
| 36  | 8   | 9.50       | 1700                | 62.68    | 1109.91 | 8.76                           |
| 37  |     | 9.42       | 1771                | 61.87    | 1182.82 | 8.55                           |
| 38  |     | 9.50       | 2605                | 62.38    | 1245.40 | 8.65                           |
| 39  |     | 9.42       | 1843                | 63.47    | 1176.91 | 8.74                           |
| 40  |     | 9.50       | 1846                | 63.46    | 1119.78 | 8.90                           |
| 41  | 9   | 9.13       | 1790                | 62.33    | 1156.07 | 8.76                           |

|    |    |      |      |       |         |      |
|----|----|------|------|-------|---------|------|
| 42 |    | 9.56 | 1265 | 63.33 | 1176.49 | 8.69 |
| 43 |    | 9.47 | 1199 | 61.34 | 1184.38 | 8.21 |
| 44 |    | 9.39 | 1834 | 60.99 | 1193.49 | 8.16 |
| 45 |    | 9.56 | 1287 | 62.72 | 1177.02 | 8.40 |
| 46 |    | 9.77 | 7865 | 55.29 | 956.93  | 7.63 |
| 47 |    | 9.68 | 5652 | 51.93 | 739.49  | 8.27 |
| 48 | 10 | 9.21 | 7667 | 55.80 | 881.56  | 8.48 |
| 49 |    | 9.40 | 5535 | 59.46 | 985.16  | 8.76 |
| 50 |    | 9.68 | 7812 | 56.73 | 870.96  | 8.54 |
| 51 |    | 9.41 | 3520 | 56.57 | 892.22  | 8.84 |
| 52 |    | 9.50 | 4882 | 55.69 | 863.71  | 8.72 |
| 53 | 11 | 9.50 | 5045 | 55.39 | 797.67  | 5.04 |
| 54 |    | 9.41 | 3397 | 52.24 | 715.20  | 8.56 |
| 55 |    | 9.41 | 4896 | 55.61 | 859.24  | 8.53 |
| 56 |    | 8.88 | 4276 | 57.21 | 891.69  | 8.98 |
| 57 |    | 8.79 | 2911 | 57.48 | 834.67  | 9.18 |
| 58 | 12 | 8.79 | 4072 | 55.26 | 873.38  | 8.86 |
| 59 |    | 8.88 | 2864 | 56.06 | 913.60  | 8.82 |
| 60 |    | 8.71 | 2987 | 57.37 | 926.60  | 8.91 |
| 61 |    | 5.77 | 4819 | 24.92 | 369.51  | 3.79 |
| 62 |    | 5.84 | 4641 | 25.41 | 393.80  | 3.87 |
| 63 | 13 | 5.77 | 3400 | 24.51 | 410.00  | 3.76 |
| 64 |    | 5.77 | 4671 | 23.86 | 430.71  | 3.74 |
| 65 |    | 5.84 | 4759 | 25.04 | 447.44  | 3.63 |
| 66 |    | 6.55 | 2123 | 26.57 | 442.40  | 4.21 |
| 67 |    | 6.70 | 3160 | 25.56 | 396.51  | 4.00 |
| 68 | 14 | 6.63 | 2210 | 26.08 | 497.44  | 4.12 |
| 69 |    | 6.55 | 2289 | 26.47 | 408.18  | 4.23 |
| 70 |    | 6.63 | 2213 | 26.61 | 444.89  | 4.23 |
| 71 |    | 6.52 | 1799 | 24.98 | 525.53  | 3.88 |
| 72 |    | 6.44 | 1738 | 20.92 | 437.91  | 3.41 |
| 73 | 15 | 6.69 | 2594 | 25.27 | 472.16  | 3.88 |
| 74 |    | 6.60 | 1729 | 22.27 | 452.60  | 3.35 |
| 75 |    | 6.60 | 2616 | 22.28 | 490.80  | 2.36 |
| 76 |    | 7.67 | 9511 | 29.97 | 561.18  | 4.10 |
| 77 |    | 8.71 | 9453 | 30.98 | 410.49  | 4.44 |
| 78 | 16 | 7.82 | 9751 | 33.14 | 575.76  | 4.51 |
| 79 |    | 8.09 | 9288 | 40.65 | 446.64  | 6.37 |
| 80 |    | 8.48 | 9417 | 35.41 | 625.20  | 4.85 |
| 81 |    | 8.28 | 8436 | 32.30 | 613.22  | 4.30 |
| 82 |    | 8.38 | 8721 | 29.11 | 609.36  | 4.23 |
| 83 | 17 | 8.28 | 5659 | 28.31 | 416.13  | 4.18 |
| 84 |    | 8.19 | 5899 | 28.48 | 554.42  | 4.18 |
| 85 |    | 8.38 | 5890 | 28.57 | 586.98  | 4.22 |
| 86 | 18 | 7.98 | 6862 | 34.81 | 643.98  | 5.18 |
| 87 |    | 8.16 | 4786 | 35.45 | 691.89  | 5.38 |

|     |    |      |       |       |         |      |
|-----|----|------|-------|-------|---------|------|
| 88  |    | 8.42 | 6651  | 35.54 | 729.91  | 4.87 |
| 89  |    | 8.33 | 4514  | 35.67 | 732.47  | 5.40 |
| 90  |    | 8.16 | 6826  | 35.53 | 670.80  | 5.00 |
| 91  |    | 7.46 | 2321  | 56.95 | 1133.58 | 4.41 |
| 92  |    | 7.38 | 2502  | 58.99 | 1174.38 | 3.78 |
| 93  | 19 | 7.38 | 3301  | 50.45 | 1119.73 | 3.14 |
| 94  |    | 7.46 | 3392  | 57.42 | 1124.82 | 4.03 |
| 95  |    | 7.38 | 2212  | 47.84 | 1161.42 | 2.88 |
| 96  |    | 7.37 | 1125  | 46.93 | 904.69  | 5.27 |
| 97  |    | 7.20 | 1127  | 40.13 | 1020.84 | 2.99 |
| 98  | 20 | 7.03 | 1084  | 38.55 | 999.47  | 3.48 |
| 99  |    | 7.12 | 1050  | 44.51 | 766.13  | 4.48 |
| 100 |    | 7.28 | 1624  | 23.26 | 1081.09 | 1.49 |
| 101 |    | 6.54 | 1719  | 36.63 | 974.31  | 2.31 |
| 102 |    | 6.62 | 1716  | 38.36 | 839.96  | 3.84 |
| 103 | 21 | 6.78 | 1762  | 36.87 | 944.71  | 2.85 |
| 104 |    | 6.70 | 2484  | 23.07 | 914.49  | 1.82 |
| 105 |    | 6.78 | 1784  | 37.29 | 695.07  | 3.77 |
| 106 |    | 7.25 | 9278  | 61.19 | 973.51  | 9.41 |
| 107 |    | 7.75 | 9086  | 68.57 | 1197.67 | 9.16 |
| 108 | 22 | 7.41 | 6042  | 65.82 | 1120.04 | 9.63 |
| 109 |    | 7.95 | 6082  | 68.67 | 1221.67 | 9.61 |
| 110 |    | 7.33 | 8807  | 61.89 | 1178.62 | 9.08 |
| 111 |    | 9.87 | 10485 | 68.34 | 1103.33 | 8.02 |
| 112 |    | 9.77 | 10097 | 62.83 | 1129.40 | 8.72 |
| 113 | 23 | 8.89 | 6966  | 70.81 | 1159.02 | 9.45 |
| 114 |    | 9.96 | 6939  | 67.73 | 1017.80 | 9.70 |
| 115 |    | 9.67 | 6972  | 65.69 | 1126.93 | 9.39 |
| 116 |    | 8.39 | 3111  | 45.40 | 734.33  | 5.75 |
| 117 |    | 8.85 | 3954  | 46.41 | 628.29  | 6.74 |
| 118 | 24 | 9.32 | 3194  | 59.45 | 1001.22 | 7.85 |
| 119 |    | 8.85 | 4762  | 54.61 | 762.78  | 7.54 |
| 120 |    | 8.35 | 4749  | 55.27 | 959.60  | 7.15 |
| 121 |    | 6.74 | 2543  | 17.56 | 322.20  | 2.19 |
| 122 |    | 6.57 | 2671  | 18.73 | 333.42  | 2.53 |
| 123 | 25 | 6.83 | 1805  | 14.81 | 354.69  | 2.16 |
| 124 |    | 6.48 | 2630  | 16.03 | 302.53  | 2.22 |
| 125 |    | 6.48 | 1855  | 15.83 | 346.87  | 2.36 |
| 126 |    | 6.28 | 2216  | 16.93 | 355.47  | 2.32 |
| 127 |    | 6.04 | 2171  | 21.91 | 377.18  | 2.59 |
| 128 | 26 | 6.20 | 1510  | 21.22 | 379.00  | 2.48 |
| 129 |    | 6.12 | 1430  | 21.55 | 373.64  | 2.68 |
| 130 |    | 6.12 | 2132  | 21.27 | 398.27  | 2.60 |
| 131 |    | 6.61 | 1158  | 22.56 | 468.36  | 3.05 |
| 132 | 27 | 6.44 | 761   | 24.63 | 457.56  | 3.42 |
| 133 |    | 6.52 | 1129  | 21.28 | 213.20  | 2.90 |

|          |      |          |       |         |      |
|----------|------|----------|-------|---------|------|
| 134      | 6.35 | 809      | 23.58 | 508.47  | 3.24 |
| 135      | 6.44 | 1123     | 24.17 | 528.44  | 3.40 |
| Min:     | 5.77 | 761.00   | 14.81 | 213.20  | 1.49 |
| Max:     | 9.96 | 10485.00 | 70.81 | 1245.40 | 9.78 |
| Average: | 7.88 | 3962.46  | 45.73 | 860.02  | 5.88 |

**Supplementary Table S2.** Measured for EPC, SPE, SPP, Area to Nominal and Volume to Nominal for each experimental run and five replicas per run.

| A/A | Run | EPC (MJ) | SPE (MJ/g) | SPP (kW/g) | Area 2 Nom [%] | Volume 2 Nom [%] |
|-----|-----|----------|------------|------------|----------------|------------------|
| 1   | 1   | 1.728    | 0.266      | 0.044      | 70.7%          | 67.8%            |
| 2   |     | 1.764    | 0.250      | 0.027      | 70.4%          | 67.3%            |
| 3   |     | 1.836    | 0.266      | 0.044      | 71.7%          | 68.6%            |
| 4   |     | 1.080    | 0.159      | 0.018      | 72.2%          | 69.0%            |
| 5   |     | 1.728    | 0.250      | 0.040      | 71.6%          | 68.1%            |
| 6   | 2   | 1.152    | 0.133      | 0.037      | 97.6%          | 97.2%            |
| 7   |     | 1.908    | 0.233      | 0.064      | 97.3%          | 96.8%            |
| 8   |     | 2.052    | 0.248      | 0.046      | 96.3%          | 95.9%            |
| 9   |     | 2.016    | 0.246      | 0.046      | 97.0%          | 96.3%            |
| 10  |     | 1.980    | 0.239      | 0.065      | 96.8%          | 96.0%            |
| 11  | 3   | 0.936    | 0.138      | 0.048      | 101.3%         | 100.8%           |
| 12  |     | 1.008    | 0.150      | 0.054      | 101.2%         | 100.4%           |
| 13  |     | 0.972    | 0.145      | 0.035      | 101.0%         | 100.4%           |
| 14  |     | 1.620    | 0.242      | 0.087      | 100.9%         | 100.0%           |
| 15  |     | 1.548    | 0.234      | 0.058      | 101.0%         | 100.2%           |
| 16  | 4   | 1.224    | 0.150      | 0.048      | 99.9%          | 100.1%           |
| 17  |     | 1.188    | 0.144      | 0.047      | 99.6%          | 99.6%            |
| 18  |     | 0.756    | 0.092      | 0.029      | 99.4%          | 99.4%            |
| 19  |     | 0.684    | 0.080      | 0.018      | 99.3%          | 99.2%            |
| 20  |     | 1.188    | 0.140      | 0.032      | 99.6%          | 99.1%            |
| 21  | 5   | 0.792    | 0.089      | 0.039      | 101.8%         | 100.3%           |
| 22  |     | 0.828    | 0.105      | 0.045      | 103.0%         | 101.4%           |
| 23  |     | 0.828    | 0.100      | 0.043      | 102.1%         | 100.6%           |
| 24  |     | 0.828    | 0.098      | 0.029      | 102.1%         | 100.1%           |
| 25  |     | 1.368    | 0.156      | 0.065      | 101.8%         | 99.7%            |
| 26  | 6   | 0.756    | 0.101      | 0.049      | 99.1%          | 97.8%            |
| 27  |     | 0.684    | 0.093      | 0.043      | 99.1%          | 97.5%            |
| 28  |     | 1.260    | 0.167      | 0.115      | 99.6%          | 98.2%            |
| 29  |     | 0.684    | 0.089      | 0.060      | 99.8%          | 97.9%            |
| 30  |     | 0.756    | 0.091      | 0.042      | 99.6%          | 97.6%            |
| 31  | 7   | 0.792    | 0.083      | 0.027      | 102.7%         | 100.3%           |
| 32  |     | 0.720    | 0.076      | 0.016      | 102.9%         | 100.4%           |
| 33  |     | 0.720    | 0.076      | 0.025      | 103.8%         | 101.8%           |
| 34  |     | 0.756    | 0.078      | 0.025      | 103.5%         | 101.5%           |
| 35  |     | 1.296    | 0.136      | 0.044      | 103.3%         | 101.0%           |
| 36  | 8   | 0.684    | 0.072      | 0.042      | 97.7%          | 96.1%            |
| 37  |     | 1.080    | 0.115      | 0.065      | 98.3%          | 96.4%            |

|    |    |       |       |       |        |        |
|----|----|-------|-------|-------|--------|--------|
| 38 |    | 0.648 | 0.068 | 0.026 | 97.8%  | 96.3%  |
| 39 |    | 1.116 | 0.118 | 0.064 | 99.5%  | 98.0%  |
| 40 |    | 0.648 | 0.068 | 0.037 | 98.6%  | 96.8%  |
| 41 |    | 0.720 | 0.079 | 0.044 | 104.0% | 103.0% |
| 42 |    | 0.720 | 0.075 | 0.060 | 103.9% | 103.1% |
| 43 | 9  | 0.396 | 0.042 | 0.035 | 104.5% | 103.6% |
| 44 |    | 0.468 | 0.050 | 0.027 | 103.2% | 102.4% |
| 45 |    | 0.396 | 0.041 | 0.032 | 105.0% | 104.0% |
| 46 |    | 2.052 | 0.210 | 0.027 | 98.1%  | 97.8%  |
| 47 |    | 2.016 | 0.208 | 0.037 | 97.2%  | 97.1%  |
| 48 | 10 | 1.188 | 0.129 | 0.017 | 97.8%  | 97.7%  |
| 49 |    | 2.016 | 0.214 | 0.039 | 98.0%  | 97.6%  |
| 50 |    | 1.188 | 0.123 | 0.016 | 97.2%  | 96.5%  |
| 51 |    | 1.188 | 0.126 | 0.036 | 100.1% | 99.3%  |
| 52 |    | 1.260 | 0.133 | 0.027 | 99.3%  | 98.6%  |
| 53 | 11 | 1.224 | 0.129 | 0.026 | 100.1% | 99.3%  |
| 54 |    | 0.720 | 0.077 | 0.023 | 99.0%  | 98.3%  |
| 55 |    | 1.188 | 0.126 | 0.026 | 99.8%  | 99.5%  |
| 56 |    | 1.764 | 0.199 | 0.046 | 98.1%  | 97.9%  |
| 57 |    | 0.972 | 0.111 | 0.038 | 98.0%  | 97.8%  |
| 58 | 12 | 1.800 | 0.205 | 0.050 | 98.9%  | 98.8%  |
| 59 |    | 1.692 | 0.191 | 0.067 | 98.4%  | 98.1%  |
| 60 |    | 1.692 | 0.194 | 0.065 | 98.3%  | 98.5%  |
| 61 |    | 1.080 | 0.187 | 0.039 | 97.0%  | 97.0%  |
| 62 |    | 1.008 | 0.173 | 0.037 | 96.9%  | 97.0%  |
| 63 | 13 | 0.648 | 0.112 | 0.033 | 96.0%  | 95.7%  |
| 64 |    | 1.044 | 0.181 | 0.039 | 96.5%  | 96.6%  |
| 65 |    | 1.044 | 0.179 | 0.038 | 97.5%  | 97.1%  |
| 66 |    | 0.432 | 0.066 | 0.031 | 97.2%  | 97.1%  |
| 67 |    | 0.432 | 0.064 | 0.020 | 99.5%  | 100.1% |
| 68 | 14 | 0.432 | 0.065 | 0.029 | 96.8%  | 97.3%  |
| 69 |    | 0.720 | 0.110 | 0.048 | 97.1%  | 97.6%  |
| 70 |    | 0.720 | 0.109 | 0.049 | 98.9%  | 99.0%  |
| 71 |    | 0.864 | 0.133 | 0.074 | 101.6% | 101.4% |
| 72 |    | 0.540 | 0.084 | 0.048 | 100.8% | 100.6% |
| 73 | 15 | 0.900 | 0.135 | 0.052 | 98.5%  | 98.4%  |
| 74 |    | 0.900 | 0.136 | 0.079 | 100.2% | 100.0% |
| 75 |    | 0.576 | 0.087 | 0.033 | 101.6% | 101.5% |
| 76 |    | 4.523 | 0.590 | 0.062 | 98.7%  | 98.1%  |
| 77 |    | 3.564 | 0.409 | 0.043 | 101.3% | 100.7% |
| 78 | 16 | 3.996 | 0.511 | 0.052 | 98.8%  | 98.5%  |
| 79 |    | 4.154 | 0.513 | 0.055 | 98.2%  | 97.6%  |
| 80 |    | 3.780 | 0.446 | 0.047 | 98.9%  | 98.1%  |
| 81 |    | 2.237 | 0.270 | 0.032 | 98.6%  | 98.8%  |
| 82 | 17 | 1.296 | 0.155 | 0.018 | 98.9%  | 98.9%  |
| 83 |    | 2.088 | 0.252 | 0.045 | 97.2%  | 97.2%  |



|     |    |       |       |       |        |        |
|-----|----|-------|-------|-------|--------|--------|
| 84  |    | 2.439 | 0.298 | 0.050 | 98.0%  | 98.2%  |
| 85  |    | 1.152 | 0.137 | 0.023 | 98.4%  | 98.3%  |
| 86  |    | 1.296 | 0.162 | 0.024 | 103.1% | 102.6% |
| 87  |    | 2.016 | 0.247 | 0.052 | 101.3% | 100.9% |
| 88  | 18 | 1.296 | 0.154 | 0.023 | 100.8% | 100.5% |
| 89  |    | 2.088 | 0.251 | 0.056 | 101.4% | 100.9% |
| 90  |    | 1.944 | 0.238 | 0.035 | 101.1% | 100.9% |
| 91  |    | 1.764 | 0.236 | 0.102 | 99.6%  | 99.5%  |
| 92  |    | 1.764 | 0.239 | 0.096 | 99.6%  | 99.5%  |
| 93  | 19 | 1.008 | 0.137 | 0.041 | 99.1%  | 98.8%  |
| 94  |    | 1.044 | 0.140 | 0.041 | 99.4%  | 99.3%  |
| 95  |    | 1.080 | 0.146 | 0.066 | 99.4%  | 99.1%  |
| 96  |    | 0.828 | 0.112 | 0.100 | 97.7%  | 97.3%  |
| 97  |    | 0.468 | 0.065 | 0.058 | 98.0%  | 97.5%  |
| 98  | 20 | 0.468 | 0.067 | 0.061 | 99.2%  | 98.6%  |
| 99  |    | 0.792 | 0.111 | 0.106 | 98.9%  | 98.3%  |
| 100 |    | 0.504 | 0.069 | 0.043 | 98.7%  | 98.0%  |
| 101 |    | 0.828 | 0.127 | 0.074 | 90.8%  | 90.5%  |
| 102 |    | 0.504 | 0.076 | 0.044 | 91.1%  | 90.5%  |
| 103 | 21 | 0.468 | 0.069 | 0.039 | 90.9%  | 90.3%  |
| 104 |    | 0.432 | 0.064 | 0.026 | 91.7%  | 91.2%  |
| 105 |    | 0.468 | 0.069 | 0.039 | 91.2%  | 90.6%  |
| 106 |    | 5.436 | 0.750 | 0.081 | 97.3%  | 96.8%  |
| 107 |    | 5.436 | 0.701 | 0.077 | 98.0%  | 97.3%  |
| 108 | 22 | 3.492 | 0.471 | 0.078 | 98.7%  | 98.0%  |
| 109 |    | 5.292 | 0.666 | 0.109 | 98.2%  | 97.9%  |
| 110 |    | 5.328 | 0.727 | 0.083 | 97.9%  | 97.4%  |
| 111 |    | 5.076 | 0.514 | 0.049 | 103.3% | 103.4% |
| 112 |    | 4.729 | 0.484 | 0.048 | 102.4% | 102.4% |
| 113 | 23 | 5.580 | 0.628 | 0.090 | 102.5% | 102.8% |
| 114 |    | 5.040 | 0.506 | 0.073 | 103.8% | 103.9% |
| 115 |    | 5.256 | 0.544 | 0.078 | 103.4% | 103.4% |
| 116 |    | 3.204 | 0.382 | 0.123 | 98.1%  | 98.0%  |
| 117 |    | 4.883 | 0.552 | 0.140 | 97.7%  | 97.5%  |
| 118 | 24 | 3.060 | 0.328 | 0.103 | 97.6%  | 97.3%  |
| 119 |    | 2.709 | 0.306 | 0.064 | 98.4%  | 98.2%  |
| 120 |    | 2.912 | 0.349 | 0.073 | 96.8%  | 96.4%  |
| 121 |    | 0.252 | 0.037 | 0.015 | 97.9%  | 97.4%  |
| 122 |    | 0.252 | 0.038 | 0.014 | 97.4%  | 97.1%  |
| 123 | 25 | 0.252 | 0.037 | 0.020 | 97.4%  | 97.0%  |
| 124 |    | 0.432 | 0.067 | 0.025 | 97.6%  | 97.1%  |
| 125 |    | 0.432 | 0.067 | 0.036 | 97.4%  | 97.0%  |
| 126 |    | 0.756 | 0.120 | 0.054 | 97.9%  | 97.6%  |
| 127 | 26 | 0.684 | 0.113 | 0.052 | 96.3%  | 95.9%  |
| 128 |    | 1.224 | 0.197 | 0.131 | 97.7%  | 97.3%  |
| 129 |    | 0.720 | 0.118 | 0.082 | 97.6%  | 97.3%  |



|          |    |       |       |       |        |        |
|----------|----|-------|-------|-------|--------|--------|
| 130      |    | 0.756 | 0.124 | 0.058 | 96.6%  | 96.1%  |
| 131      |    | 0.216 | 0.033 | 0.028 | 100.8% | 100.8% |
| 132      |    | 0.360 | 0.056 | 0.073 | 100.8% | 100.6% |
| 133      | 27 | 0.360 | 0.055 | 0.049 | 101.6% | 101.3% |
| 134      |    | 0.360 | 0.057 | 0.070 | 100.3% | 100.1% |
| 135      |    | 0.360 | 0.056 | 0.050 | 100.5% | 100.1% |
| Min:     |    | 0.216 | 0.033 | 0.014 | 70.4%  | 67.3%  |
| Max:     |    | 5.580 | 0.750 | 0.140 | 105.0% | 104.0% |
| Average: |    | 1.531 | 0.190 | 0.050 | 98.1%  | 97.5%  |

### Statistical analysis

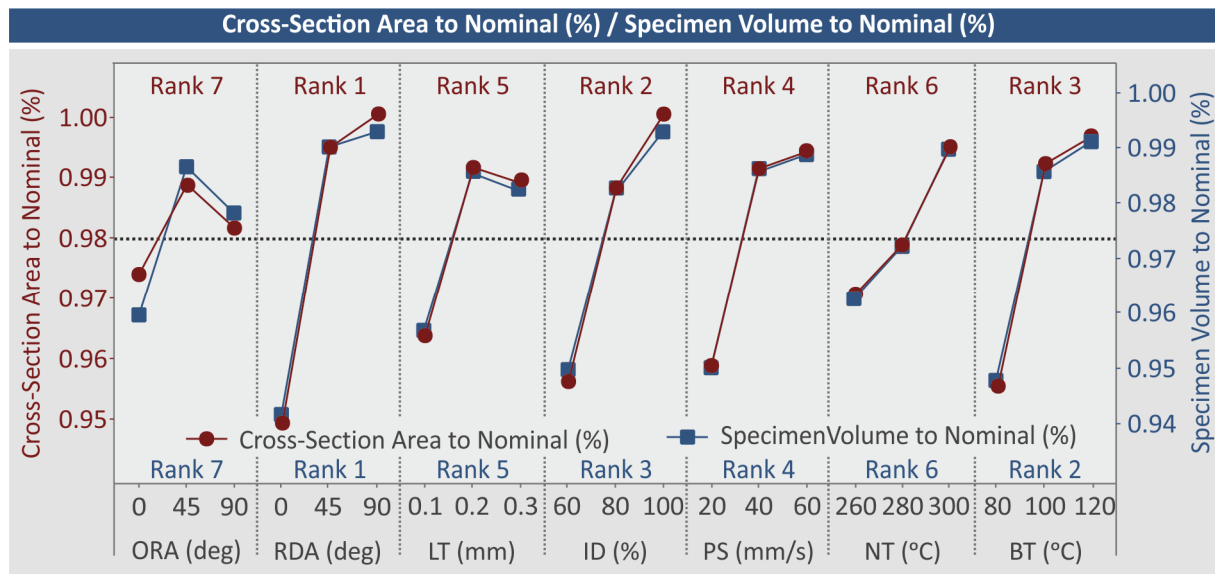

**Figure S3.** MEP for the area to nominal (%) and the volume to nominal (%) vs the control parameters of the work.

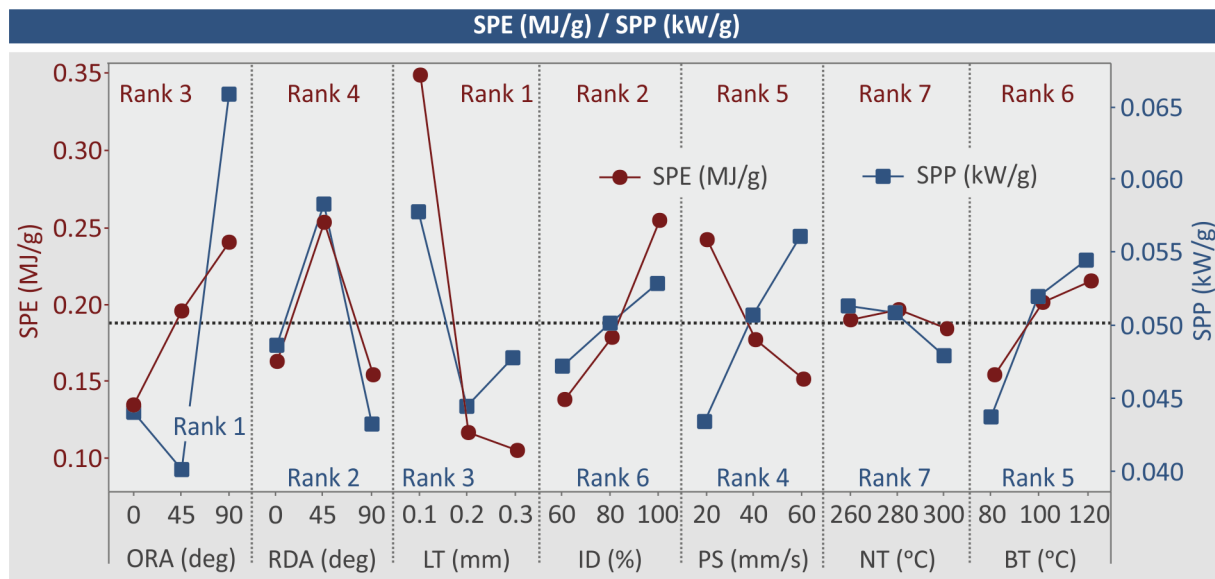

**Figure S4.** MEP for the SPE (MJ/g) and the SPP (kW/g) vs the control parameters of the work.

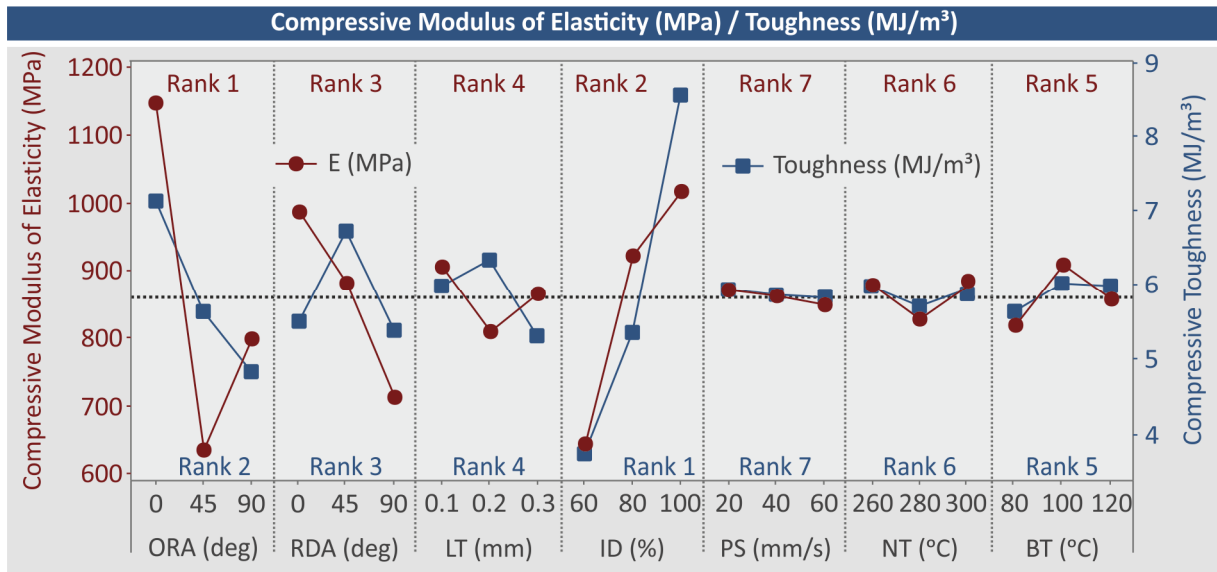

**Figure S5.** MEP for the compressive modulus of elasticity (MPa) and the compressive toughness (MJ/m<sup>3</sup>) vs the control parameters of the work.

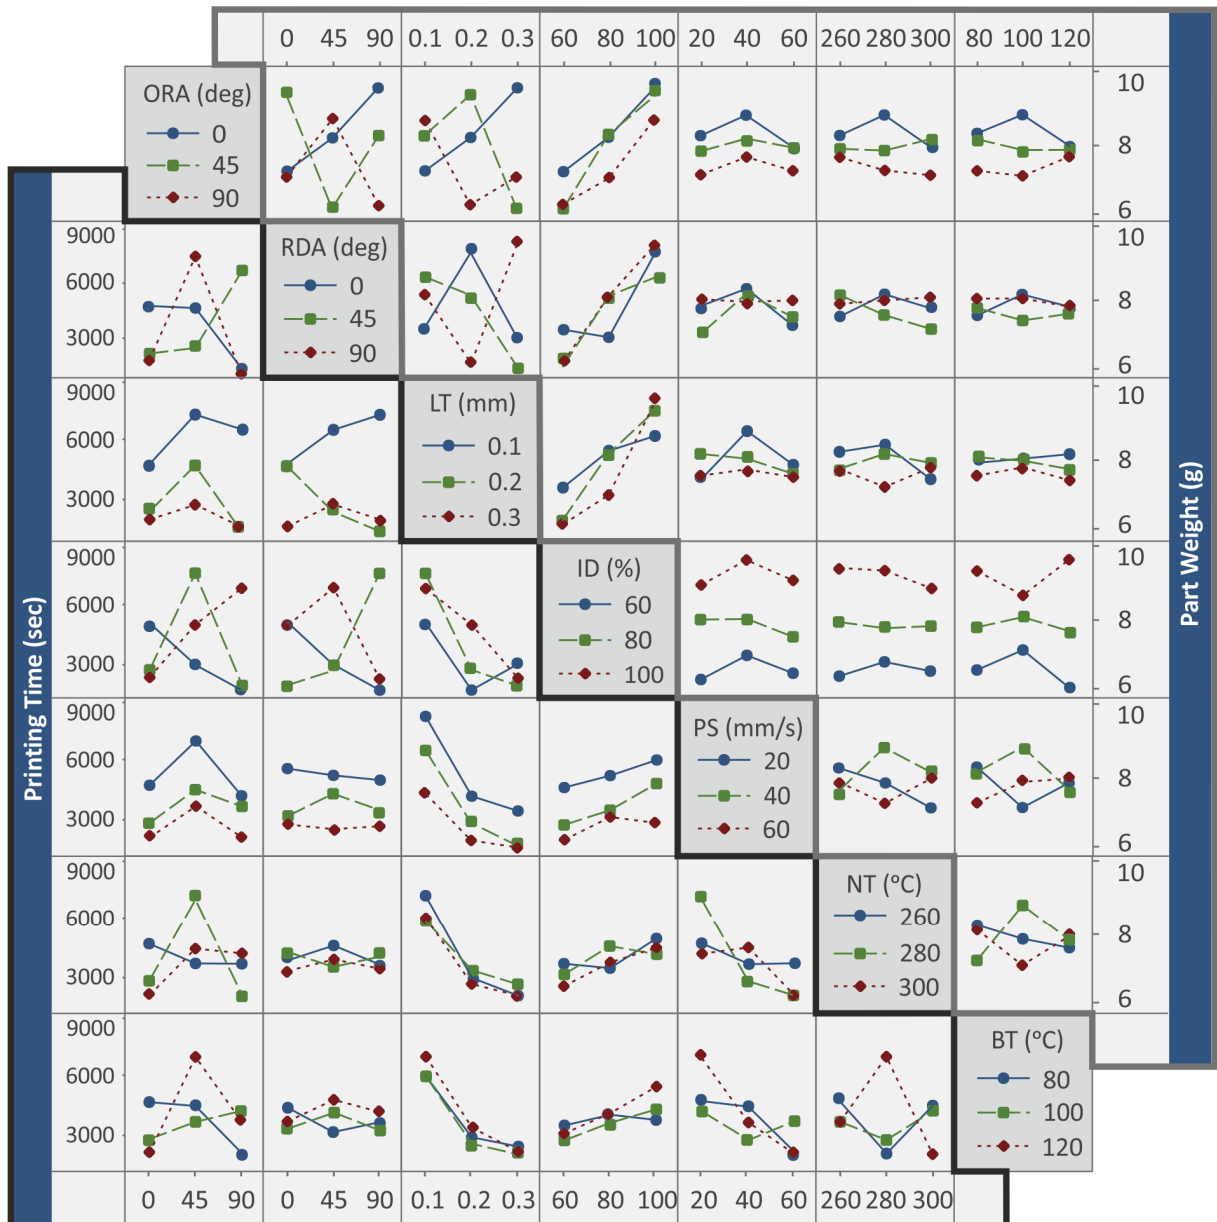

**Figure S6.** Interaction plots for the printing time (sec) and the part weight (g) vs the control parameters of the work.

### Regression analysis

**Supplementary Table S3.** Polynomial ANOVA, Weight vs ORA, RDA, LT, ID, PS, NT, BT.

| Source                | DF     | Adj SS  | Adj MS  | F-Value | P-Value |
|-----------------------|--------|---------|---------|---------|---------|
| Regression            | 14     | 168.979 | 12.0699 | 60.09   | 0.000   |
| ORA                   | 1      | 0.513   | 0.5130  | 2.55    | 0.113   |
| RDA                   | 1      | 1.268   | 1.2675  | 6.31    | 0.013   |
| LT                    | 1      | 0.085   | 0.0848  | 0.42    | 0.517   |
| ID                    | 1      | 0.182   | 0.1822  | 0.91    | 0.343   |
| PS                    | 1      | 5.873   | 5.8734  | 29.24   | 0.000   |
| NT                    | 1      | 0.489   | 0.4886  | 2.43    | 0.121   |
| BT                    | 1      | 0.219   | 0.2193  | 1.09    | 0.298   |
| ORA <sup>2</sup>      | 1      | 0.265   | 0.2651  | 1.32    | 0.253   |
| RDA <sup>2</sup>      | 1      | 1.900   | 1.9001  | 9.46    | 0.003   |
| LT <sup>2</sup>       | 1      | 0.337   | 0.3371  | 1.68    | 0.198   |
| ID <sup>2</sup>       | 1      | 0.169   | 0.1688  | 0.84    | 0.361   |
| PS <sup>2</sup>       | 1      | 6.165   | 6.1653  | 30.69   | 0.000   |
| NT <sup>2</sup>       | 1      | 0.512   | 0.5122  | 2.55    | 0.113   |
| BT <sup>2</sup>       | 1      | 0.239   | 0.2394  | 1.19    | 0.277   |
| Error                 | 120    | 24.105  | 0.2009  |         |         |
| Total                 | 134    | 193.084 | 12.2708 |         |         |
| R <sup>2</sup>        | 87.52% |         |         |         |         |
| R <sup>2</sup> (adj)  | 86.06% |         |         |         |         |
| R <sup>2</sup> (pred) | 84.20% |         |         |         |         |

**Supplementary Table S4.** Polynomial ANOVA, Printing Time vs ORA, RDA, LT, ID, PS, NT, BT.

| Source           | DF | Adj SS    | Adj MS   | F-Value | P-Value |
|------------------|----|-----------|----------|---------|---------|
| Regression       | 14 | 706262553 | 50447325 | 47.63   | 0.000   |
| ORA              | 1  | 84907876  | 84907876 | 80.16   | 0.000   |
| RDA              | 1  | 1211558   | 1211558  | 1.14    | 0.287   |
| LT               | 1  | 94007356  | 94007356 | 88.75   | 0.000   |
| ID               | 1  | 966427    | 966427   | 0.91    | 0.341   |
| PS               | 1  | 11187797  | 11187797 | 10.56   | 0.001   |
| NT               | 1  | 557496    | 557496   | 0.53    | 0.470   |
| BT               | 1  | 4552714   | 4552714  | 4.30    | 0.040   |
| ORA <sup>2</sup> | 1  | 88392312  | 88392312 | 83.45   | 0.000   |
| RDA <sup>2</sup> | 1  | 1732483   | 1732483  | 1.64    | 0.203   |
| LT <sup>2</sup>  | 1  | 50056389  | 50056389 | 47.26   | 0.000   |
| ID <sup>2</sup>  | 1  | 259718    | 259718   | 0.25    | 0.621   |
| PS <sup>2</sup>  | 1  | 2618229   | 2618229  | 2.47    | 0.119   |
| NT <sup>2</sup>  | 1  | 623617    | 623617   | 0.59    | 0.444   |
| BT <sup>2</sup>  | 1  | 5107713   | 5107713  | 4.82    | 0.030   |

|                       |        |           |          |
|-----------------------|--------|-----------|----------|
| Error                 | 120    | 127102889 | 1059191  |
| Total                 | 134    | 833365442 | 51506516 |
| R <sup>2</sup>        | 84.75% |           |          |
| R <sup>2</sup> (adj)  | 82.97% |           |          |
| R <sup>2</sup> (pred) | 80.70% |           |          |

**Supplementary Table S5.** Polynomial ANOVA, sB vs ORA, RDA, LT, ID, PS, NT, BT.

| Source                | DF     | Adj SS  | Adj MS  | F-Value | P-Value |
|-----------------------|--------|---------|---------|---------|---------|
| Regression            | 14     | 33181.4 | 2370.10 | 110.32  | 0.000   |
| ORA                   | 1      | 7071.2  | 7071.25 | 329.16  | 0.000   |
| RDA                   | 1      | 140.5   | 140.49  | 6.54    | 0.012   |
| LT                    | 1      | 17.0    | 17.03   | 0.79    | 0.375   |
| ID                    | 1      | 51.4    | 51.40   | 2.39    | 0.125   |
| PS                    | 1      | 2.9     | 2.94    | 0.14    | 0.712   |
| NT                    | 1      | 132.7   | 132.67  | 6.18    | 0.014   |
| BT                    | 1      | 185.6   | 185.62  | 8.64    | 0.004   |
| ORA <sup>2</sup>      | 1      | 4200.4  | 4200.37 | 195.52  | 0.000   |
| RDA <sup>2</sup>      | 1      | 731.6   | 731.56  | 34.05   | 0.000   |
| LT <sup>2</sup>       | 1      | 0.9     | 0.87    | 0.04    | 0.841   |
| ID <sup>2</sup>       | 1      | 6.7     | 6.65    | 0.31    | 0.579   |
| PS <sup>2</sup>       | 1      | 0.0     | 0.05    | 0.00    | 0.962   |
| NT <sup>2</sup>       | 1      | 135.5   | 135.52  | 6.31    | 0.013   |
| BT <sup>2</sup>       | 1      | 165.2   | 165.17  | 7.69    | 0.006   |
| Error                 | 120    | 2578.0  | 21.48   |         |         |
| Total                 | 134    | 35759.4 | 2391.58 |         |         |
| R <sup>2</sup>        | 92.79% |         |         |         |         |
| R <sup>2</sup> (adj)  | 91.95% |         |         |         |         |
| R <sup>2</sup> (pred) | 90.88% |         |         |         |         |

**Supplementary Table S6.** Polynomial ANOVA, E vs ORA, RDA, LT, ID, PS, NT, BT.

| Source           | DF | Adj SS   | Adj MS  | F-Value | P-Value |
|------------------|----|----------|---------|---------|---------|
| Regression       | 14 | 11885814 | 848987  | 111.95  | 0.000   |
| ORA              | 1  | 5080771  | 5080771 | 669.96  | 0.000   |
| RDA              | 1  | 38213    | 38213   | 5.04    | 0.027   |
| LT               | 1  | 190282   | 190282  | 25.09   | 0.000   |
| ID               | 1  | 393052   | 393052  | 51.83   | 0.000   |
| PS               | 1  | 5        | 5       | 0.00    | 0.979   |
| NT               | 1  | 73522    | 73522   | 9.69    | 0.002   |
| BT               | 1  | 159905   | 159905  | 21.09   | 0.000   |
| ORA <sup>2</sup> | 1  | 3475276  | 3475276 | 458.26  | 0.000   |
| RDA <sup>2</sup> | 1  | 30196    | 30196   | 3.98    | 0.048   |
| LT <sup>2</sup>  | 1  | 170401   | 170401  | 22.47   | 0.000   |
| ID <sup>2</sup>  | 1  | 250395   | 250395  | 33.02   | 0.000   |
| PS <sup>2</sup>  | 1  | 160      | 160     | 0.02    | 0.885   |

|                       |        |          |        |       |       |
|-----------------------|--------|----------|--------|-------|-------|
| NT <sup>2</sup>       | 1      | 73495    | 73495  | 9.69  | 0.002 |
| BT <sup>2</sup>       | 1      | 151608   | 151608 | 19.99 | 0.000 |
| Error                 | 120    | 910039   | 7584   |       |       |
| Total                 | 134    | 12795853 | 856571 |       |       |
| R <sup>2</sup>        | 92.89% |          |        |       |       |
| R <sup>2</sup> (adj)  | 92.06% |          |        |       |       |
| R <sup>2</sup> (pred) | 91.00% |          |        |       |       |

**Supplementary Table S7.** Polynomial ANOVA, Toughness vs ORA, RDA, LT, ID, PS, NT, BT.

| Source                | DF     | Adj SS  | Adj MS  | F-Value | P-Value |
|-----------------------|--------|---------|---------|---------|---------|
| Regression            | 14     | 748.321 | 53.4515 | 103.93  | 0.000   |
| ORA                   | 1      | 23.937  | 23.9367 | 46.54   | 0.000   |
| RDA                   | 1      | 43.711  | 43.7110 | 84.99   | 0.000   |
| LT                    | 1      | 11.176  | 11.1756 | 21.73   | 0.000   |
| ID                    | 1      | 6.868   | 6.8677  | 13.35   | 0.000   |
| PS                    | 1      | 0.031   | 0.0312  | 0.06    | 0.806   |
| NT                    | 1      | 1.864   | 1.8638  | 3.62    | 0.059   |
| BT                    | 1      | 1.526   | 1.5256  | 2.97    | 0.088   |
| ORA <sup>2</sup>      | 1      | 3.756   | 3.7562  | 7.30    | 0.008   |
| RDA <sup>2</sup>      | 1      | 49.246  | 49.2461 | 95.75   | 0.000   |
| LT <sup>2</sup>       | 1      | 14.775  | 14.7748 | 28.73   | 0.000   |
| ID <sup>2</sup>       | 1      | 18.337  | 18.3366 | 35.65   | 0.000   |
| PS <sup>2</sup>       | 1      | 0.011   | 0.0105  | 0.02    | 0.886   |
| NT <sup>2</sup>       | 1      | 1.855   | 1.8547  | 3.61    | 0.060   |
| BT <sup>2</sup>       | 1      | 1.293   | 1.2927  | 2.51    | 0.115   |
| Error                 | 120    | 61.715  | 0.5143  |         |         |
| Total                 | 134    | 810.036 | 53.9658 |         |         |
| R <sup>2</sup>        | 92.38% |         |         |         |         |
| R <sup>2</sup> (adj)  | 91.49% |         |         |         |         |
| R <sup>2</sup> (pred) | 90.36% |         |         |         |         |

**Supplementary Table S8.** Polynomial ANOVA, EPC vs ORA, RDA, LT, ID, PS, NT, BT.

| Source           | DF | Adj SS  | Adj MS  | F-Value | P-Value |
|------------------|----|---------|---------|---------|---------|
| Regression       | 14 | 210.911 | 15.0651 | 61.28   | 0.000   |
| ORA              | 1  | 2.353   | 2.3531  | 9.57    | 0.002   |
| RDA              | 1  | 16.948  | 16.9475 | 68.94   | 0.000   |
| LT               | 1  | 36.700  | 36.6996 | 149.28  | 0.000   |
| ID               | 1  | 0.186   | 0.1859  | 0.76    | 0.386   |
| PS               | 1  | 0.304   | 0.3037  | 1.24    | 0.269   |
| NT               | 1  | 0.375   | 0.3746  | 1.52    | 0.219   |
| BT               | 1  | 0.380   | 0.3801  | 1.55    | 0.216   |
| ORA <sup>2</sup> | 1  | 0.169   | 0.1691  | 0.69    | 0.409   |
| RDA <sup>2</sup> | 1  | 18.691  | 18.6908 | 76.03   | 0.000   |
| LT <sup>2</sup>  | 1  | 22.044  | 22.0438 | 89.67   | 0.000   |

|                       |        |         |         |      |       |
|-----------------------|--------|---------|---------|------|-------|
| ID <sup>2</sup>       | 1      | 0.769   | 0.7692  | 3.13 | 0.079 |
| PS <sup>2</sup>       | 1      | 0.011   | 0.0112  | 0.05 | 0.831 |
| NT <sup>2</sup>       | 1      | 0.394   | 0.3935  | 1.60 | 0.208 |
| BT <sup>2</sup>       | 1      | 0.228   | 0.2281  | 0.93 | 0.337 |
| Error                 | 120    | 29.501  | 0.2458  |      |       |
| Total                 | 134    | 240.412 | 15.3109 |      |       |
| R <sup>2</sup>        | 87.73% |         |         |      |       |
| R <sup>2</sup> (adj)  | 86.30% |         |         |      |       |
| R <sup>2</sup> (pred) | 84.47% |         |         |      |       |

**Supplementary Table S9.** Polynomial ANOVA, SPE vs ORA, RDA, LT, ID, PS, NT, BT.

| Source                | DF     | Adj SS  | Adj MS   | F-Value | P-Value |
|-----------------------|--------|---------|----------|---------|---------|
| Regression            | 14     | 2.84707 | 0.203362 | 48.28   | 0.000   |
| ORA                   | 1      | 0.03376 | 0.033764 | 8.02    | 0.005   |
| RDA                   | 1      | 0.24127 | 0.241268 | 57.28   | 0.000   |
| LT                    | 1      | 0.58828 | 0.588276 | 139.67  | 0.000   |
| ID                    | 1      | 0.00287 | 0.002870 | 0.68    | 0.411   |
| PS                    | 1      | 0.02833 | 0.028326 | 6.73    | 0.011   |
| NT                    | 1      | 0.00258 | 0.002580 | 0.61    | 0.435   |
| BT                    | 1      | 0.01172 | 0.011721 | 2.78    | 0.098   |
| ORA <sup>2</sup>      | 1      | 0.00222 | 0.002217 | 0.53    | 0.470   |
| RDA <sup>2</sup>      | 1      | 0.27121 | 0.271209 | 64.39   | 0.000   |
| LT <sup>2</sup>       | 1      | 0.36893 | 0.368934 | 87.60   | 0.000   |
| ID <sup>2</sup>       | 1      | 0.00879 | 0.008793 | 2.09    | 0.151   |
| PS <sup>2</sup>       | 1      | 0.01175 | 0.011752 | 2.79    | 0.097   |
| NT <sup>2</sup>       | 1      | 0.00263 | 0.002632 | 0.62    | 0.431   |
| BT <sup>2</sup>       | 1      | 0.00841 | 0.008409 | 2.00    | 0.160   |
| Error                 | 120    | 0.50541 | 0.004212 |         |         |
| Total                 | 134    | 3.35248 | 0.207574 |         |         |
| R <sup>2</sup>        | 84.92% |         |          |         |         |
| R <sup>2</sup> (adj)  | 83.17% |         |          |         |         |
| R <sup>2</sup> (pred) | 80.92% |         |          |         |         |

**Supplementary Table S10.** Polynomial ANOVA, SPP vs ORA, RDA, LT, ID, PS, NT, BT.

| Source           | DF | Adj SS   | Adj MS   | F-Value | P-Value |
|------------------|----|----------|----------|---------|---------|
| Regression       | 19 | 0.038026 | 0.002001 | 5.03    | 0.000   |
| ORA              | 1  | 0.002458 | 0.002458 | 6.18    | 0.014   |
| RDA              | 1  | 0.000080 | 0.000080 | 0.20    | 0.655   |
| LT               | 1  | 0.001687 | 0.001687 | 4.24    | 0.042   |
| ID               | 1  | 0.000009 | 0.000009 | 0.02    | 0.881   |
| PS               | 1  | 0.000295 | 0.000295 | 0.74    | 0.391   |
| NT               | 1  | 0.000123 | 0.000123 | 0.31    | 0.580   |
| BT               | 1  | 0.000202 | 0.000202 | 0.51    | 0.477   |
| ORA <sup>2</sup> | 1  | 0.006625 | 0.006625 | 16.65   | 0.000   |

|                       |        |          |          |       |       |
|-----------------------|--------|----------|----------|-------|-------|
| RDA <sup>2</sup>      | 1      | 0.004589 | 0.004589 | 11.53 | 0.001 |
| LT <sup>2</sup>       | 1      | 0.002091 | 0.002091 | 5.25  | 0.024 |
| ID <sup>2</sup>       | 1      | 0.000001 | 0.000001 | 0.00  | 0.958 |
| PS <sup>2</sup>       | 1      | 0.000026 | 0.000026 | 0.07  | 0.798 |
| NT <sup>2</sup>       | 1      | 0.000047 | 0.000047 | 0.12  | 0.732 |
| BT <sup>2</sup>       | 1      | 0.000259 | 0.000259 | 0.65  | 0.422 |
| RDA·PS                | 1      | 0.001454 | 0.001454 | 3.65  | 0.058 |
| RDA·NT                | 1      | 0.000005 | 0.000005 | 0.01  | 0.907 |
| RDA·BT                | 1      | 0.001478 | 0.001478 | 3.71  | 0.056 |
| LT·PS                 | 1      | 0.000640 | 0.000640 | 1.61  | 0.207 |
| LT·NT                 | 1      | 0.003008 | 0.003008 | 7.56  | 0.007 |
| Error                 | 115    | 0.045756 | 0.000398 |       |       |
| Total                 | 134    | 0.083782 | 0.002399 |       |       |
| R <sup>2</sup>        | 45.39% |          |          |       |       |
| R <sup>2</sup> (adj)  | 36.36% |          |          |       |       |
| R <sup>2</sup> (pred) | 24.56% |          |          |       |       |

**Supplementary Table S11.** Polynomial ANOVA, Area2Nom vs ORA, RDA, LT, ID, PS, NT, BT.

| Source                | DF     | Adj SS   | Adj MS   | F-Value | P-Value |
|-----------------------|--------|----------|----------|---------|---------|
| Regression            | 19     | 0.358513 | 0.018869 | 20.67   | 0.000   |
| ORA                   | 1      | 0.004644 | 0.004644 | 5.09    | 0.026   |
| RDA                   | 1      | 0.051852 | 0.051852 | 56.79   | 0.000   |
| LT                    | 1      | 0.000356 | 0.000356 | 0.39    | 0.534   |
| ID                    | 1      | 0.004895 | 0.004895 | 5.36    | 0.022   |
| PS                    | 1      | 0.010447 | 0.010447 | 11.44   | 0.001   |
| NT                    | 1      | 0.000284 | 0.000284 | 0.31    | 0.578   |
| BT                    | 1      | 0.014281 | 0.014281 | 15.64   | 0.000   |
| ORA <sup>2</sup>      | 1      | 0.003615 | 0.003615 | 3.96    | 0.049   |
| RDA <sup>2</sup>      | 1      | 0.012142 | 0.012142 | 13.30   | 0.000   |
| LT <sup>2</sup>       | 1      | 0.007029 | 0.007029 | 7.70    | 0.006   |
| ID <sup>2</sup>       | 1      | 0.003016 | 0.003016 | 3.30    | 0.072   |
| PS <sup>2</sup>       | 1      | 0.006650 | 0.006650 | 7.28    | 0.008   |
| NT <sup>2</sup>       | 1      | 0.000473 | 0.000473 | 0.52    | 0.473   |
| BT <sup>2</sup>       | 1      | 0.007852 | 0.007852 | 8.60    | 0.004   |
| RDA·PS                | 1      | 0.011136 | 0.011136 | 12.20   | 0.001   |
| RDA·NT                | 1      | 0.033793 | 0.033793 | 37.01   | 0.000   |
| RDA·BT                | 1      | 0.028126 | 0.028126 | 30.80   | 0.000   |
| LT·PS                 | 1      | 0.000461 | 0.000461 | 0.51    | 0.479   |
| LT·NT                 | 1      | 0.001837 | 0.001837 | 2.01    | 0.159   |
| Error                 | 115    | 0.105001 | 0.000913 |         |         |
| Total                 | 134    | 0.463514 | 0.019782 |         |         |
| R <sup>2</sup>        | 77.35% |          |          |         |         |
| R <sup>2</sup> (adj)  | 73.60% |          |          |         |         |
| R <sup>2</sup> (pred) | 69.76% |          |          |         |         |



**Supplementary Table S12.** Polynomial ANOVA, Volume2Nom vs ORA, RDA, LT, ID, PS, NT, BT.

| Source                | DF     | Adj SS   | Adj MS   | F-Value | P-Value |
|-----------------------|--------|----------|----------|---------|---------|
| Regression            | 19     | 0.395443 | 0.020813 | 18.00   | 0.000   |
| ORA                   | 1      | 0.013691 | 0.013691 | 11.84   | 0.001   |
| RDA                   | 1      | 0.056448 | 0.056448 | 48.82   | 0.000   |
| LT                    | 1      | 0.000759 | 0.000759 | 0.66    | 0.419   |
| ID                    | 1      | 0.005175 | 0.005175 | 4.48    | 0.037   |
| PS                    | 1      | 0.012508 | 0.012508 | 10.82   | 0.001   |
| NT                    | 1      | 0.000311 | 0.000311 | 0.27    | 0.605   |
| BT                    | 1      | 0.015062 | 0.015062 | 13.03   | 0.000   |
| ORA <sup>2</sup>      | 1      | 0.009248 | 0.009248 | 8.00    | 0.006   |
| RDA <sup>2</sup>      | 1      | 0.015797 | 0.015797 | 13.66   | 0.000   |
| LT <sup>2</sup>       | 1      | 0.007475 | 0.007475 | 6.46    | 0.012   |
| ID <sup>2</sup>       | 1      | 0.003289 | 0.003289 | 2.84    | 0.094   |
| PS <sup>2</sup>       | 1      | 0.007889 | 0.007889 | 6.82    | 0.010   |
| NT <sup>2</sup>       | 1      | 0.000487 | 0.000487 | 0.42    | 0.518   |
| BT <sup>2</sup>       | 1      | 0.008063 | 0.008063 | 6.97    | 0.009   |
| RDA·PS                | 1      | 0.013067 | 0.013067 | 11.30   | 0.001   |
| RDA·NT                | 1      | 0.035003 | 0.035003 | 30.27   | 0.000   |
| RDA·BT                | 1      | 0.032770 | 0.032770 | 28.34   | 0.000   |
| LT·PS                 | 1      | 0.000480 | 0.000480 | 0.42    | 0.521   |
| LT·NT                 | 1      | 0.002816 | 0.002816 | 2.44    | 0.121   |
| Error                 | 115    | 0.132976 | 0.001156 |         |         |
| Total                 | 134    | 0.528419 | 0.021969 |         |         |
| R <sup>2</sup>        | 74.84% |          |          |         |         |
| R <sup>2</sup> (adj)  | 70.68% |          |          |         |         |
| R <sup>2</sup> (pred) | 66.52% |          |          |         |         |

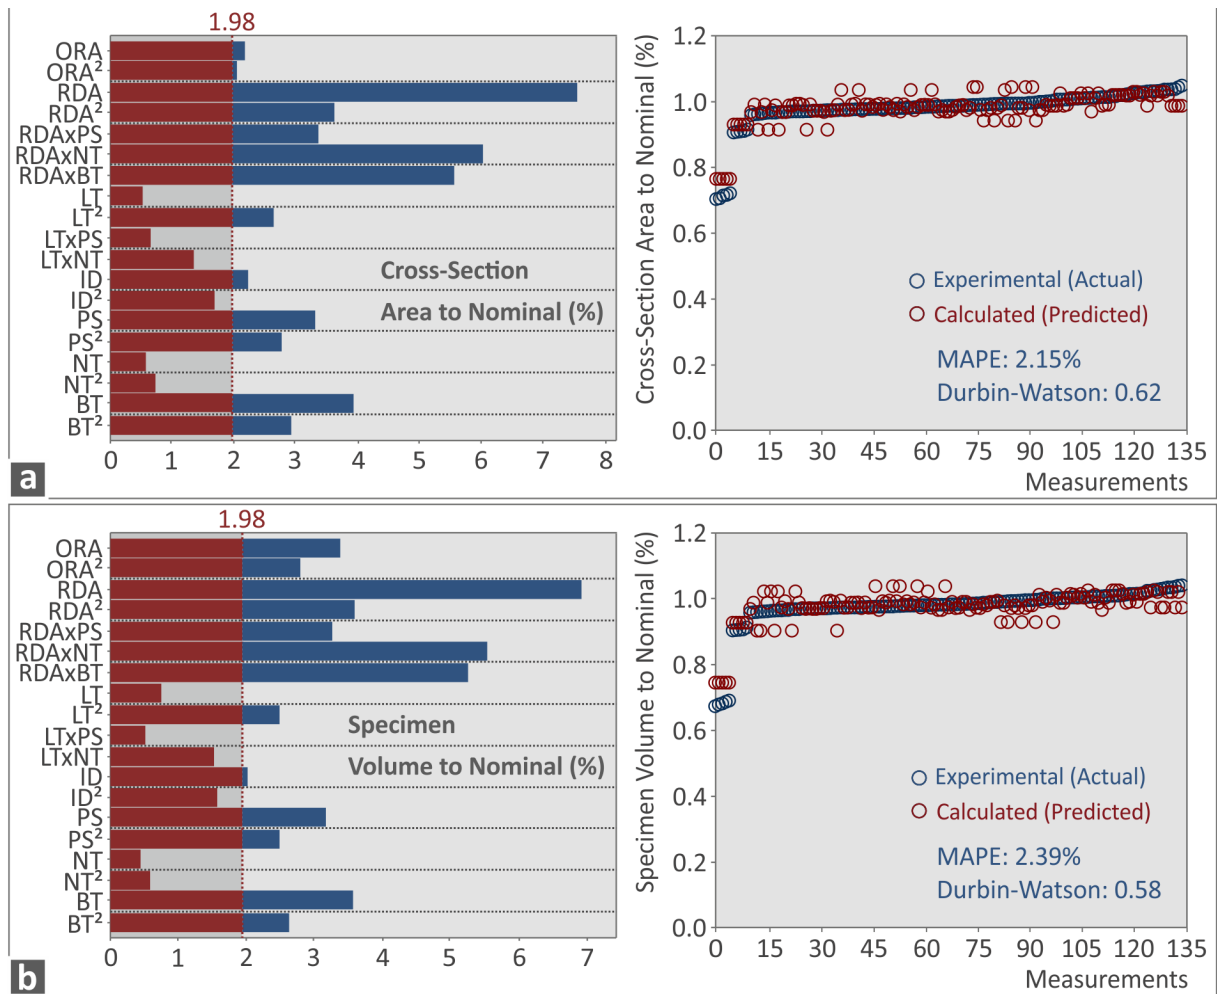

**Figure S7.** Pareto chart for (a) the area to nominal (%) and (b) the volume to nominal (%) vs the control parameters of the work, showing the parameters crossing the 1.98 threshold (statistically significant parameters). On the right side the actual vs the calculated values are shown.

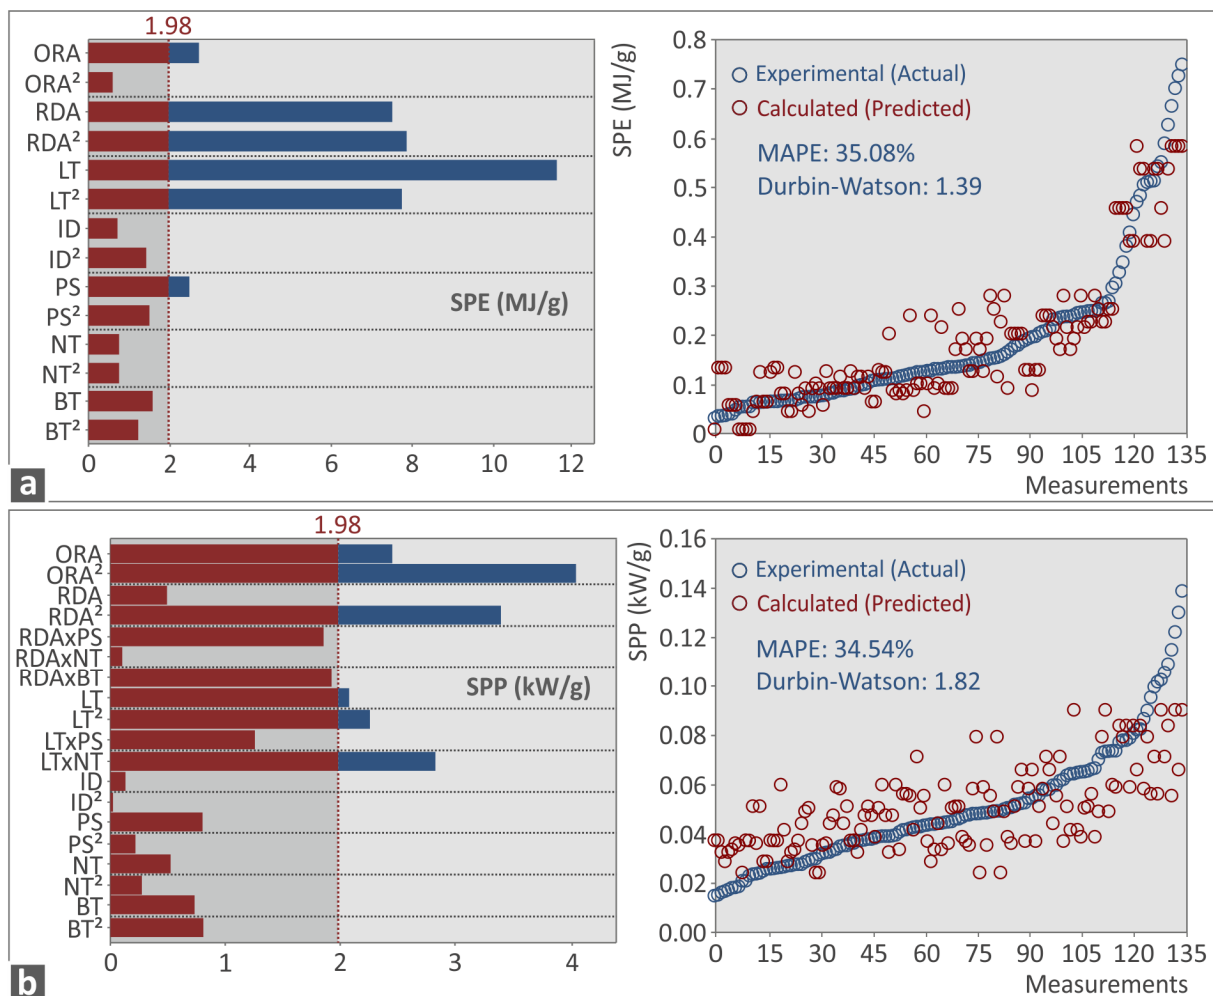

**Figure S8.** Pareto chart for (a) the SPE (MJ/g) and (b) the SPP (kW/g) vs the control parameters of the work, showing the parameters crossing the 1.98 threshold (statistically significant parameters). On the right side the actual vs the calculated values are shown.

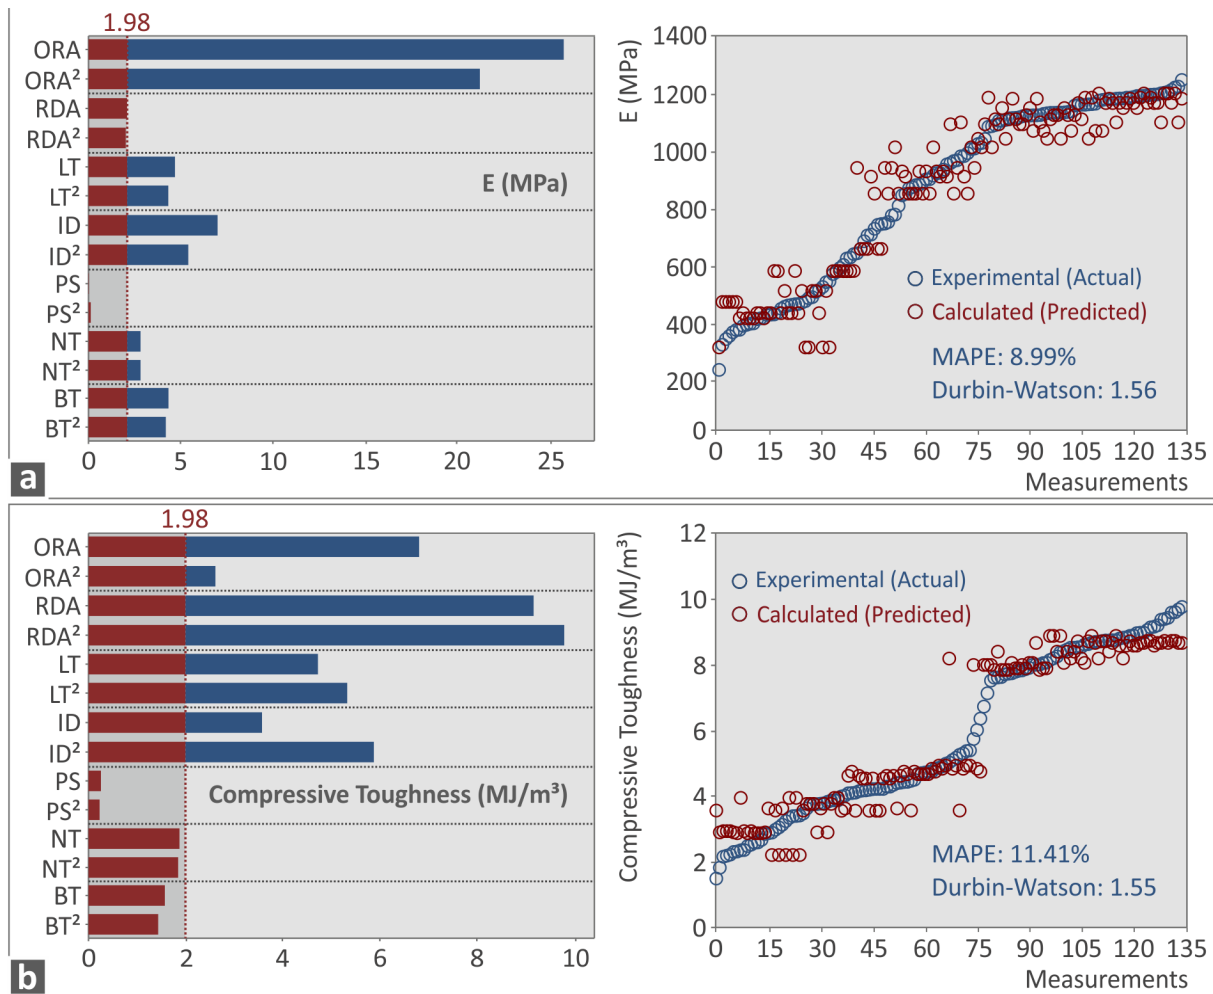

**Figure S9.** Pareto chart for (a) the compression modulus of elasticity (MPa) and (b) the compressive toughness (MJ/m³) vs the control parameters of the work, showing the parameters crossing the 1.98 threshold (statistically significant parameters). On the right side the actual vs the calculated values are shown.

### Confirmation runs

**Supplementary Table S13.** Measured Printing Time and Weight for each experimental run and five replicas per run for the Confirmation Runs.

| A/A | Run      | Weight (g) | Printing Time (sec) | sB [MPa] | E [MPa] | Toughness [MJ/m <sup>3</sup> ] |
|-----|----------|------------|---------------------|----------|---------|--------------------------------|
| 1   | 28       | 9.50       | 10465               | 81.91    | 1328.81 | 9.71                           |
| 2   |          | 9.62       | 11202               | 79.18    | 1358.29 | 9.83                           |
| 3   |          | 9.47       | 10650               | 79.99    | 1438.34 | 10.88                          |
| 4   |          | 9.64       | 11546               | 83.70    | 1329.99 | 9.86                           |
| 5   |          | 9.37       | 10410               | 78.84    | 1389.72 | 10.89                          |
| 6   | 29       | 7.46       | 1067                | 42.17    | 1001.28 | 4.79                           |
| 7   |          | 7.59       | 1343                | 42.34    | 1097.37 | 4.66                           |
| 8   |          | 7.06       | 1065                | 44.27    | 1080.36 | 4.80                           |
| 9   |          | 7.13       | 1031                | 41.45    | 1105.32 | 4.82                           |
| 10  |          | 7.11       | 1284                | 42.08    | 1058.26 | 4.60                           |
|     | Min:     | 7.06       | 1031                | 41.45    | 1001.28 | 4.60                           |
|     | Max:     | 9.64       | 11546               | 83.70    | 1438.34 | 10.89                          |
|     | Average: | 8.40       | 6006.30             | 61.59    | 1218.77 | 7.48                           |

**Supplementary Table S14.** Measured EPC, SPE, SPP, Compressive Strength, Compressive Modulus of Elasticity, Compressive Toughness for each experimental run and five replicas per run for the Confirmation Runs.

| A/A | Run      | EPC (MJ) | SPE (MJ/g) | SPP (kW/g) | Area 2 Nom [%] | Volume 2 Nom [%] |
|-----|----------|----------|------------|------------|----------------|------------------|
| 1   | 28       | 3.996    | 0.421      | 0.040      | 0.92           | 0.91             |
| 2   |          | 4.464    | 0.464      | 0.041      | 0.92           | 0.90             |
| 3   |          | 3.816    | 0.403      | 0.038      | 0.92           | 0.91             |
| 4   |          | 4.392    | 0.456      | 0.039      | 0.91           | 0.92             |
| 5   |          | 3.492    | 0.373      | 0.036      | 0.91           | 0.92             |
| 6   | 29       | 0.612    | 0.082      | 0.077      | 1.07           | 0.88             |
| 7   |          | 0.504    | 0.066      | 0.049      | 1.07           | 0.87             |
| 8   |          | 0.468    | 0.066      | 0.062      | 1.08           | 0.88             |
| 9   |          | 0.432    | 0.061      | 0.059      | 1.07           | 0.88             |
| 10  |          | 0.576    | 0.081      | 0.063      | 1.06           | 0.88             |
|     | Min:     | 0.432    | 0.061      | 0.036      | 0.91           | 0.87             |
|     | Max:     | 4.464    | 0.464      | 0.077      | 1.08           | 0.92             |
|     | Average: | 2.275    | 0.247      | 0.051      | 0.99           | 0.89             |
